# Supplementary material for: Homophily and the Speed of Social Mobilization: The Effect of Acquired and Ascribed Traits
Source: PubMed Central journal article supplement (PMC3989266; doi:10.1371/journal.pone.0095140), 2014-04-16

Supporting Information for  
Measuring and Predicting Speed of Social Mobilization

**Goodness of Fit**

We calculated several metrics for the goodness of fit of the Cox proportional hazard model. The model had 44 degrees of freedom. All tests showed that the model was a better fit to the data than a null model

| <i>Metric</i>         | <i>Value</i>    |
|-----------------------|-----------------|
| Likelihood ratio test | 998.2 (p<.0001) |
| Wald test             | 890.6 (p<.0001) |
| Score test            | 1108 (p<.0001)  |

Additionally, we calculated the concordance probability of the model, which compared the relative order of all pairs of participants in the empirical data versus the model. The concordance was 80.8%, a good probability.

**Proportional Hazards Assumption Testing**

The proportional hazards model makes the assumption that the hazard functions of different factor values are proportional across time. To check for violations to this assumption, we plotted the scaled Schoenfeld residuals for all explanatory variables (below). The lack of linear trends for any of these residuals indicates that the proportional hazards assumption holds.

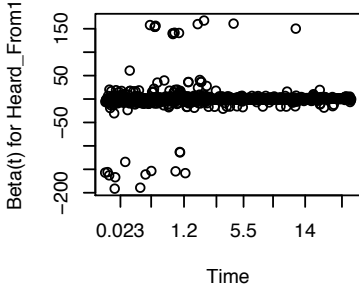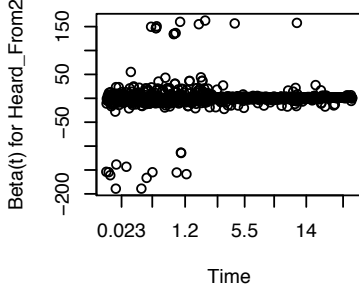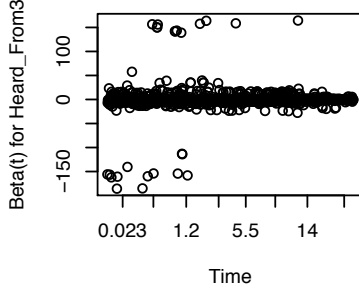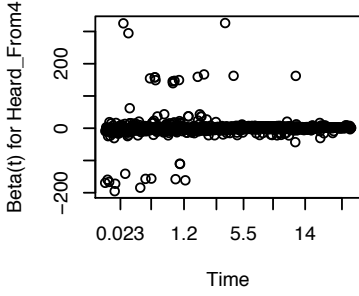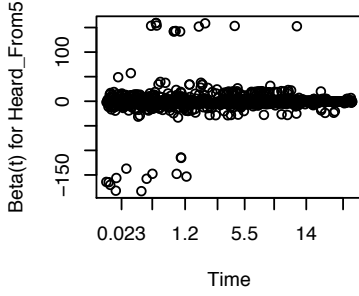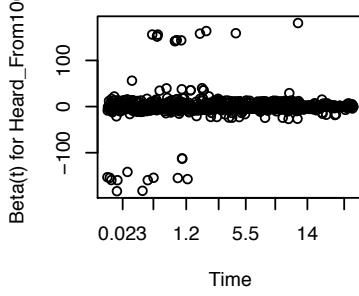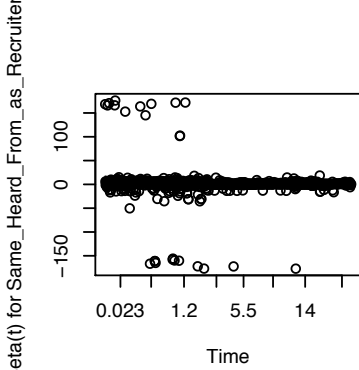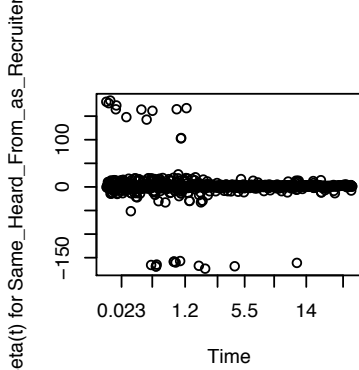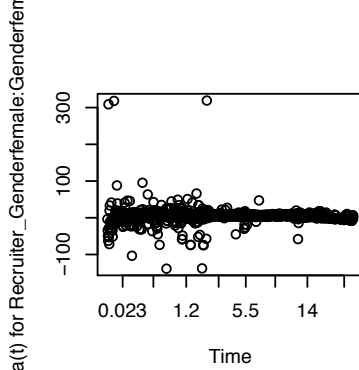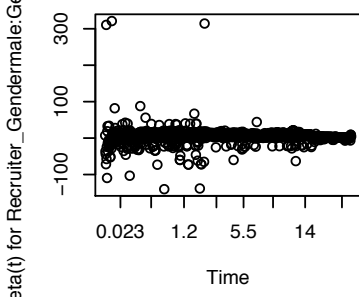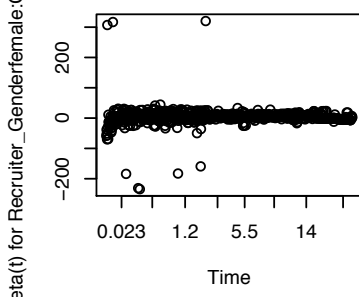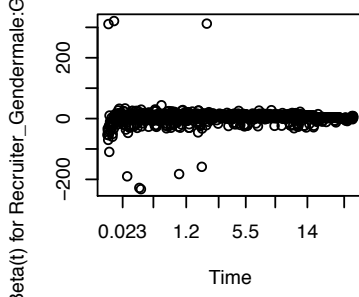

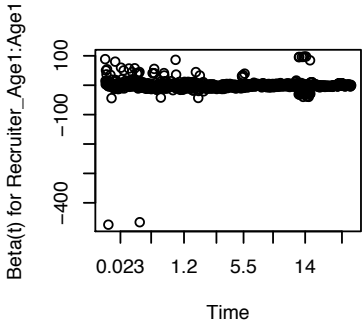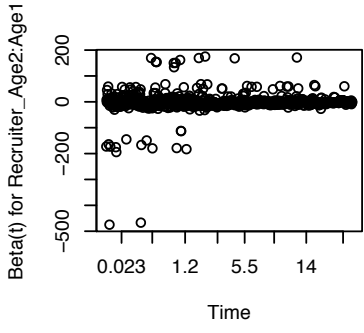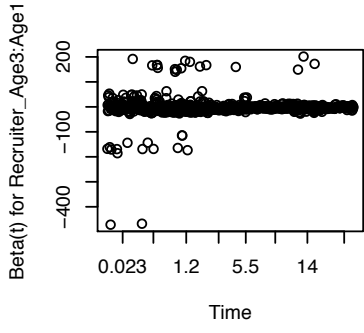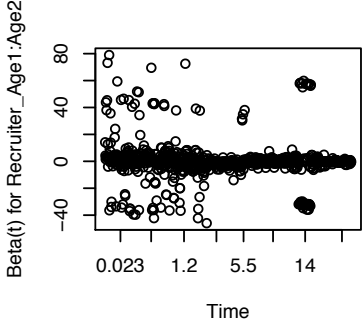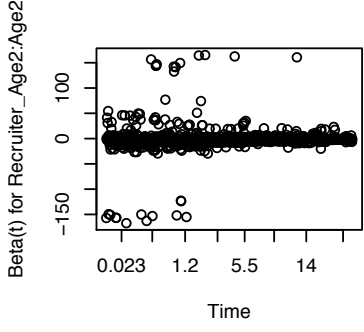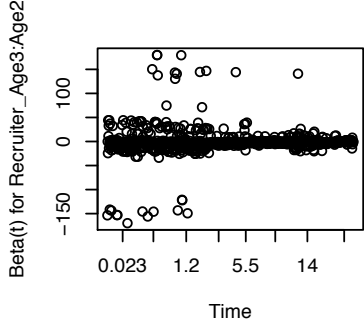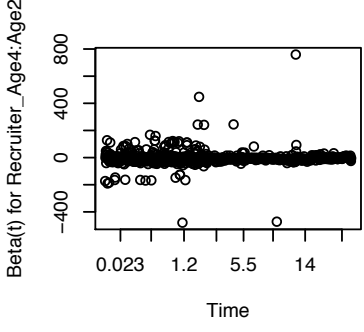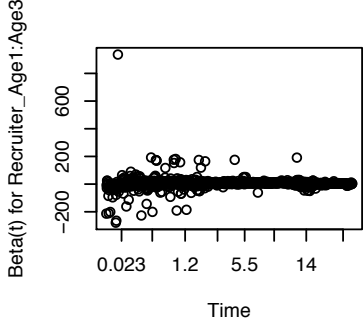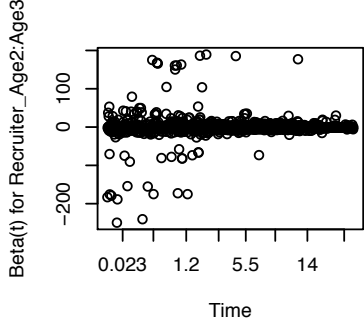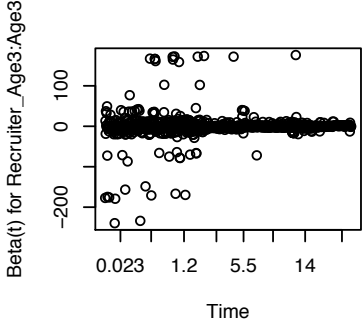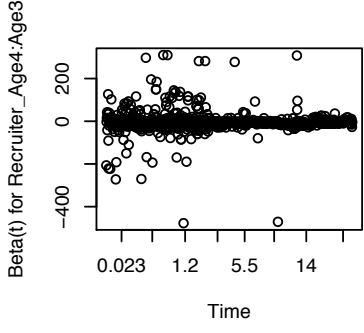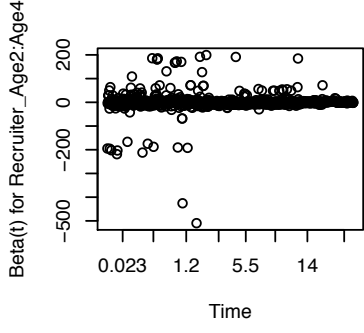

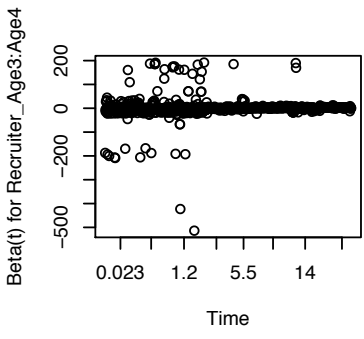

Supplement: pone.0095140.s003.pdf [file pone.0095140.s003.pdf]
